# Supplementary material for: Cardamonin protects against diabetic cardiomyopathy by activating macrophage NRF2 signaling through molecular interaction with KEAP1
Source: Royal Society of Chemistry journal article supplement (doi:10.1039/d4fo03543g), 2024-01-01
Supplement: d4fo03543g1.pdf [file d4fo03543g1.pdf]

## Tables

**Table 1. Primer sequences**

| <b>Gene<br/>(mouse)</b> | <b>Forward Primer Sequence</b> | <b>Reverse Primer Sequence</b> |
|-------------------------|--------------------------------|--------------------------------|
| <i>Anp</i>              | TCTTCCTCGTCTTGGCCTTT           | CCAGGTGGTCTAGCAGGTC            |
| <i>Bnp</i>              | GAGGTCACCTCCTATCCTCTGG         | GCCATTTCTCCGACTTTTCTC          |
| <i>β-Mhc</i>            | CCGAGTCCCAGGTCAACAA            | CTTCACGGGCACCCTTGGA            |
| <i>Ccl2</i>             | CAGGTCACCTTGAGTCCCCT           | TGGTATACATGGAGGGGCTG           |
| <i>Colla1</i>           | CGGATAGCAGATTGAGAACATCC<br>G   | CGGCTGAGTAGGGAACACACA          |
| <i>Col3a1</i>           | GCCAAATATGTGTCTGTGACTCA        | GGGCGAGTAGGAGCAGTTG            |
| <i>Gapdh</i>            | TGGTGAAGGTCGGTGTGAAC           | GCTCCTGGAAGATGGTGATGG          |
| <i>Hmox1</i>            | AGGGTCAGGTGTCCAGAGAA           | CTTCCAGGGCCGTGTAGATA           |
| <i>Icam-1</i>           | GCTACCATCACCGTGTATTCG          | AGGTCCTTGCCTACTTGCTG           |
| <i>Il-1β</i>            | AAATGCCACCTTTTGACAGTGAT<br>G   | GCAGCCCTTCATCTTTTGGG           |
| <i>Il-6</i>             | CCAGGTAGCTATGGTACTCCAGA<br>A   | GCTACCAAAGTGGATATAATCAGG<br>A  |
| <i>Nos2</i>             | CAGCTGGGCTGTACAAACCTT          | CATTGGAAGTGAAGCGTTTCG          |
| <i>Nox2</i>             | CTTCTTGGGTCAGCACTGGC           | GCAGCAAGATCAGCATGCAG           |
| <i>Nox4</i>             | CTTGGTGAATGCCCTCAACT           | TTCTGGGATCCTCATTCTGG           |
| <i>Nqo1</i>             | AGCGTTCGGTATTACGATCC           | AGTACAATCAGGGCTCTTCTCG         |
| <i>Nrf2</i>             | CATGATGGACTTGGAGTTGC           | CCTCAAAGGATGTCAATCAA           |
| <i>Sele</i>             | TCAGTGGCTGCCGAAGTATT           | TGGATCTCATGCTGGCTTCA           |
| <i>Tnf-α</i>            | ATCTACCTGGGAGGCGTCTT           | GAGTGGCACAAGGAACTGGT           |
| <i>Vcam-1</i>           | TCTTACCTGTGCGCTGTGAC           | ACTGGATCTTCAGGGAATGAGT         |

**Table 2. Antibodies**

| <b>Antibodies</b>                                                  | <b>Source</b>             | <b>Identifier</b>                   |
|--------------------------------------------------------------------|---------------------------|-------------------------------------|
| Rabbit monoclonal anti-COX2<br>WB (1:1000)                         | Cell Signaling Technology | Cat# 12282<br>RRID: AB_2571729      |
| Rabbit polyclonal anti-F4/80<br>IF (1:100); IHC (1:10000)          | Proteintech               | Cat# 29414-1-AP<br>RRID: AB_2918300 |
| Mouse monoclonal anti-GAPDH<br>WB (1:20000)                        | Proteintech               | Cat# 60004-1-Ig<br>RRID: AB_2107436 |
| Mouse monoclonal anti-HO-1<br>WB (1:1000)                          | Proteintech               | Cat# 66743-1-Ig<br>RRID: AB_2882091 |
| Mouse monoclonal Anti-iNOS<br>IF (1:100)                           | Santa Cruz Biotechnology  | Cat# sc-7271<br>RRID: AB_627810     |
| Mouse monoclonal anti-IL-1 $\beta$<br>WB (1:1000)                  | Cell Signaling Technology | Cat# 12242<br>RRID: AB_2715503      |
| Mouse monoclonal anti-IL-6<br>WB (1:1000)                          | Proteintech               | Cat# 66146-1-Ig<br>RRID: AB_2881543 |
| Rabbit monoclonal anti-TNF- $\alpha$<br>WB (1:1000)                | Cell Signaling Technology | Cat# 11948<br>RRID: AB_2687962      |
| Mouse monoclonal anti-VCAM-1<br>WB (1:1000)                        | Santa Cruz Biotechnology  | Cat# sc-13160<br>RRID: AB_626846    |
| Rabbit monoclonal anti-Phospho-<br>NF- $\kappa$ B p65, WB (1:1000) | Cell Signaling Technology | Cat# 3033<br>RRID: AB_331284        |
| Rabbit monoclonal anti-NF- $\kappa$ B<br>WB (1:1000)               | Cell Signaling Technology | Cat# 8242<br>RRID: 10859369         |
| Rabbit monoclonal anti-NRF2                                        | GeneTex                   | Cat# GTX103322                      |

|                                  |                             |                  |
|----------------------------------|-----------------------------|------------------|
| WB (1:1000)                      |                             | RRID: AB_1950993 |
| Mouse monoclonal anti-Lamin B1   | Santa Cruz Biotechnology    | Cat# sc-56144    |
| WB (1:1000)                      |                             | RRID: AB_784272  |
| Alexa Fluor® 488-conjugated      | Jackson ImmunoResearch Labs | Cat# 111-545-003 |
| Affinipure Goat Anti-Rabbit IgG  |                             | RRID: AB_2338046 |
| (1:500)                          |                             |                  |
| Alexa Fluor® 594-conjugated      | Jackson ImmunoResearch Labs | Cat# 115-585-003 |
| Affinipure Goat Anti-Mouse IgG   |                             | RRID: AB_2338871 |
| (1:500)                          |                             |                  |
| Peroxidase-conjugated Affinipure | Jackson ImmunoResearch Labs | Cat# 111-035-003 |
| Goat Anti-Rabbit IgG (1:20000)   |                             | RRID: AB_2313567 |
| HRP- conjugated Affinipure Goat  | Proteintech                 | Cat# SA00001-1   |
| Anti-Mouse IgG (1:5000)          |                             | RRID: AB_2722565 |

---
